# Supplementary material for: Genome-wide analysis of DWD proteins in soybean (Glycine max): Significance of Gm08DWD and GmMYB176 interaction in isoflavonoid biosynthesis
Source: PLoS One. 2017 Jun 6;12(6):e0178947. doi: 10.1371/journal.pone.0178947 (PMC5460815; doi:10.1371/journal.pone.0178947)
Supplement: S4 Table — (XLSX) [file pone.0178947.s005.xlsx]

## Sheet: Sheet1
Table S4 Segmental duplication events during evluotion of DWD-containing genes in soybean
ID	LOCUS_1	LOCUS_2	BLOCK_NO	BLOCK_SCORE	E_VALUE	Ka	Ks	Ka/Ks	IDENTITY
SD1	Glyma.01G006600	Glyma.07G125200	49	1674	0	0.0123	0.0836	0.147129	0.95
SD2	Glyma.01G067900	Glyma.02G124400	3	5334	0	0.0068	0.1481	0.0459149	0.986
SD3	Glyma.02G146800	Glyma.10G027100	210	4787	0	0.037	0.1804	0.2051	0.934
SD4	Glyma.02G152200	Glyma.10G022000	210	4787	0	0.0057	0.0932	0.0611588	0.987
SD5	Glyma.02G226300	Glyma.14G193200	245	9852	0	0.0209	0.1096	0.190693	0.959
SD6	Glyma.02G267800	Glyma.14G049700	253	12961	0	0.0153	0.0971	0.15757	0.966
SD7	Glyma.02G251700	Glyma.14G065100	254	3910	0	0.0193	0.1354	0.142541	0.929
SD8	Glyma.02G080600	Glyma.16G165100	266	10678	0	0.0146	0.1131	0.129089	0.969
SD9	Glyma.02G097500	Glyma.18G284000	289	2959	0	0.0177	0.1181	0.149873	0.961
SD10	Glyma.03G244500	Glyma.19G241800	409	42241	9e-173	0.0056	0.0923	0.0606717	0.969
SD11	Glyma.04G018500	Glyma.06G018800	437	31732	0	0.1252	0.2305	0.543167	0.843
SD12	Glyma.04G045700	Glyma.06G046400	437	31732	0	0.0223	0.1234	0.180713	0.951
SD13	Glyma.04G093100	Glyma.06G094900	437	31732	0	0.0278	0.0821	0.338611	0.944
SD14	Glyma.04G104200	Glyma.06G105200	437	31732	0	0.0307	0.1677	0.183065	0.944
SD15	Glyma.05G131200	Glyma.08G085900	570	21948	0	0.003	0.1183	0.0253593	0.755
SD16	Glyma.05G147800	Glyma.08G104700	570	21948	0	0.0143	0.1193	0.119866	0.939
SD17	Glyma.05G170500	Glyma.08G128700	570	21948	0	0.0042	0.0539	0.0779221	0.99
SD18	Glyma.05G187400	Glyma.08G145700	570	21948	0	0.0118	0.0643	0.183515	0.977
SD19	Glyma.05G004600	Glyma.19G005200	640	2067	0	0.0219	0.1105	0.19819	0.955
SD20	Glyma.07G068400	Glyma.16G034400	867	9097	0	0.0441	0.1299	0.339492	0.916
SD21	Glyma.07G248900	Glyma.17G025400	875	11235	0	0.0196	0.1759	0.111427	0.957
SD22	Glyma.08G180700	Glyma.15G051700	958	3106	0	0.0087	0.1112	0.0782374	0.98
SD23	Glyma.08G230900	Glyma.15G218700	960	1063	0	0.0249	0.1188	0.209596	0.834
SD24	Glyma.08G336200	Glyma.18G071300	982	1303	0	0.0041	0.0747	0.0548862	0.99
SD25	Glyma.09G234100	Glyma.12G002900	1015	3668	0	0.017	0.1862	0.0912997	0.963
SD26	Glyma.09G037300	Glyma.15G142600	1028	20180	0	0.0228	0.0842	0.270784	0.921
SD27	Glyma.09G084600	Glyma.15G193000	1028	20180	0	0.018	0.122	0.147541	0.929
SD28	Glyma.09G043800	Glyma.15G149300	1031	1394	0	0.0073	0.0999	0.0730731	0.985
SD29	Glyma.09G086200	Glyma.15G195000	1033	418	0	0.0258	0.1718	0.150175	0.872
SD30	Glyma.09G278500	Glyma.18G210300	1054	12765	0	0.0133	0.0884	0.150452	0.978
SD31	Glyma.10G133700	Glyma.20G084500	1149	4489	0	0.0076	0.1245	0.0610442	0.983
SD32	Glyma.10G200300	Glyma.20G190200	1157	35199	0	0.0195	0.1167	0.167095	0.959
SD33	Glyma.10G259600	Glyma.20G131200	1157	35199	0	0.0257	0.0701	0.366619	0.917
SD34	Glyma.10G284000	Glyma.20G105700	1157	35199	0	0.125	0.218	0.573394	0.949
SD35	Glyma.11G120700	Glyma.12G045800	1174	14670	0	0.0169	0.1044	0.161877	0.962
SD36	Glyma.13G198200	Glyma.15G236500	1322	2343	0	0.0331	0.1305	0.25364	0.948
SD37	Glyma.13G255400	Glyma.15G059400	1328	15580	0	0.0318	0.1529	0.207979	0.929
SD38	Glyma.13G229400	Glyma.15G083100	1328	15580	0	0.0231	0.1785	0.129412	0.949
SD39	Glyma.13G329300	Glyma.15G044600	1329	13713	0	0.0243	0.079	0.307595	0.955
SD40	Glyma.13G106300	Glyma.17G053100	1346	9256	0	0.0213	0.0881	0.241771	0.952
SD41	Glyma.13G056900	Glyma.19G029400	1362	6291	0	0.0214	0.1232	0.173701	0.954
SD42	Glyma.14G103000	Glyma.17G222400	1389	11453	0	0.0119	0.0942	0.126327	0.893
SD43	Glyma.15G122400	Glyma.18G072400	1422	317	0	0.343	1.3637	0.251522	0.583
SD44	Glyma.16G037700	Glyma.19G114900	1447	7457	0	0.005	0.1463	0.0341763	0.988
SD45	Glyma.16G071900	Glyma.19G063300	1450	231	0	0.0314	0.0746	0.420912	0.937
